# Supplementary material for: Derepression of Cancer/Testis Antigens in cancer is associated with distinct patterns of DNA Hypomethylation
Source: PubMed Central journal article supplement (PMC3618251; doi:10.1186/1471-2407-13-144), 2013-03-22
Supplement: 1471-2407-13-144-S2.pdf [file 1471-2407-13-144-S2.pdf]

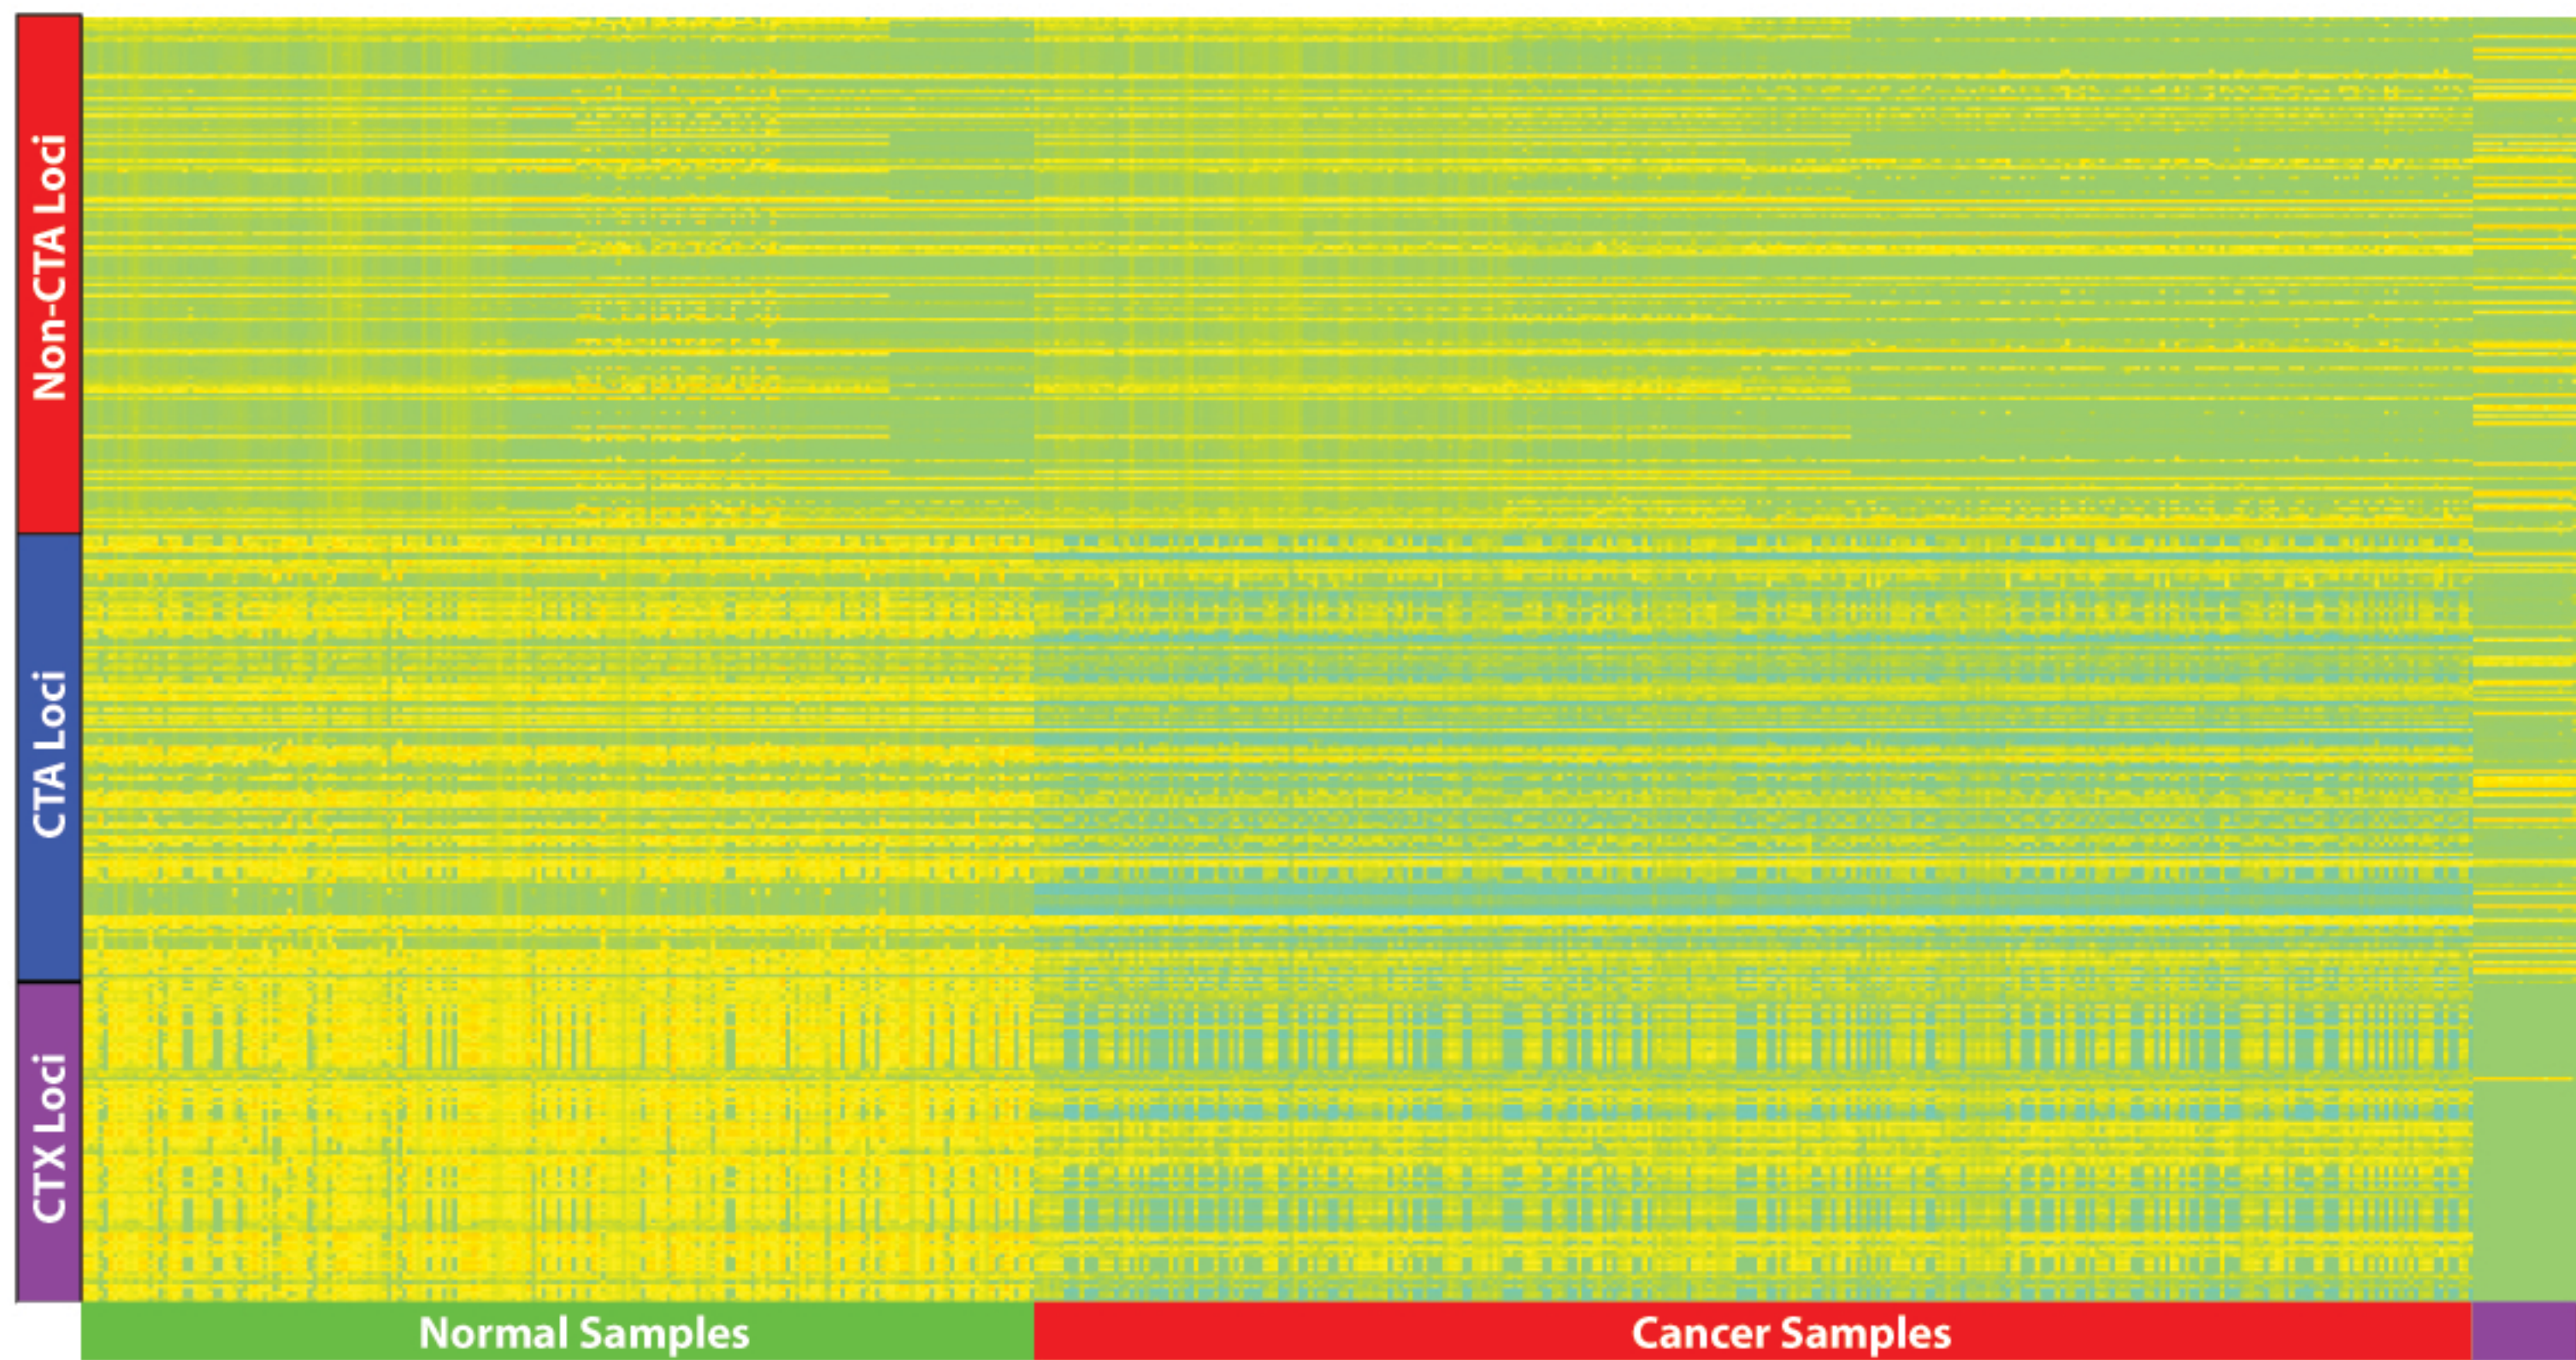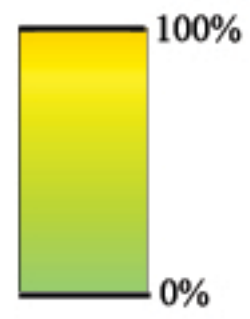

Normal Samples

Cancer Samples

Sperm Samples

Non-CTA Loci

CTA Loci

CTX Loci
