# Supplementary material for: Derepression of Cancer/Testis Antigens in cancer is associated with distinct patterns of DNA Hypomethylation
Source: PubMed Central journal article supplement (PMC3618251; doi:10.1186/1471-2407-13-144), 2013-03-22
Supplement: 1471-2407-13-144-S3.pdf [file 1471-2407-13-144-S3.pdf]

Normal Samples

Cancer Samples

Sperm

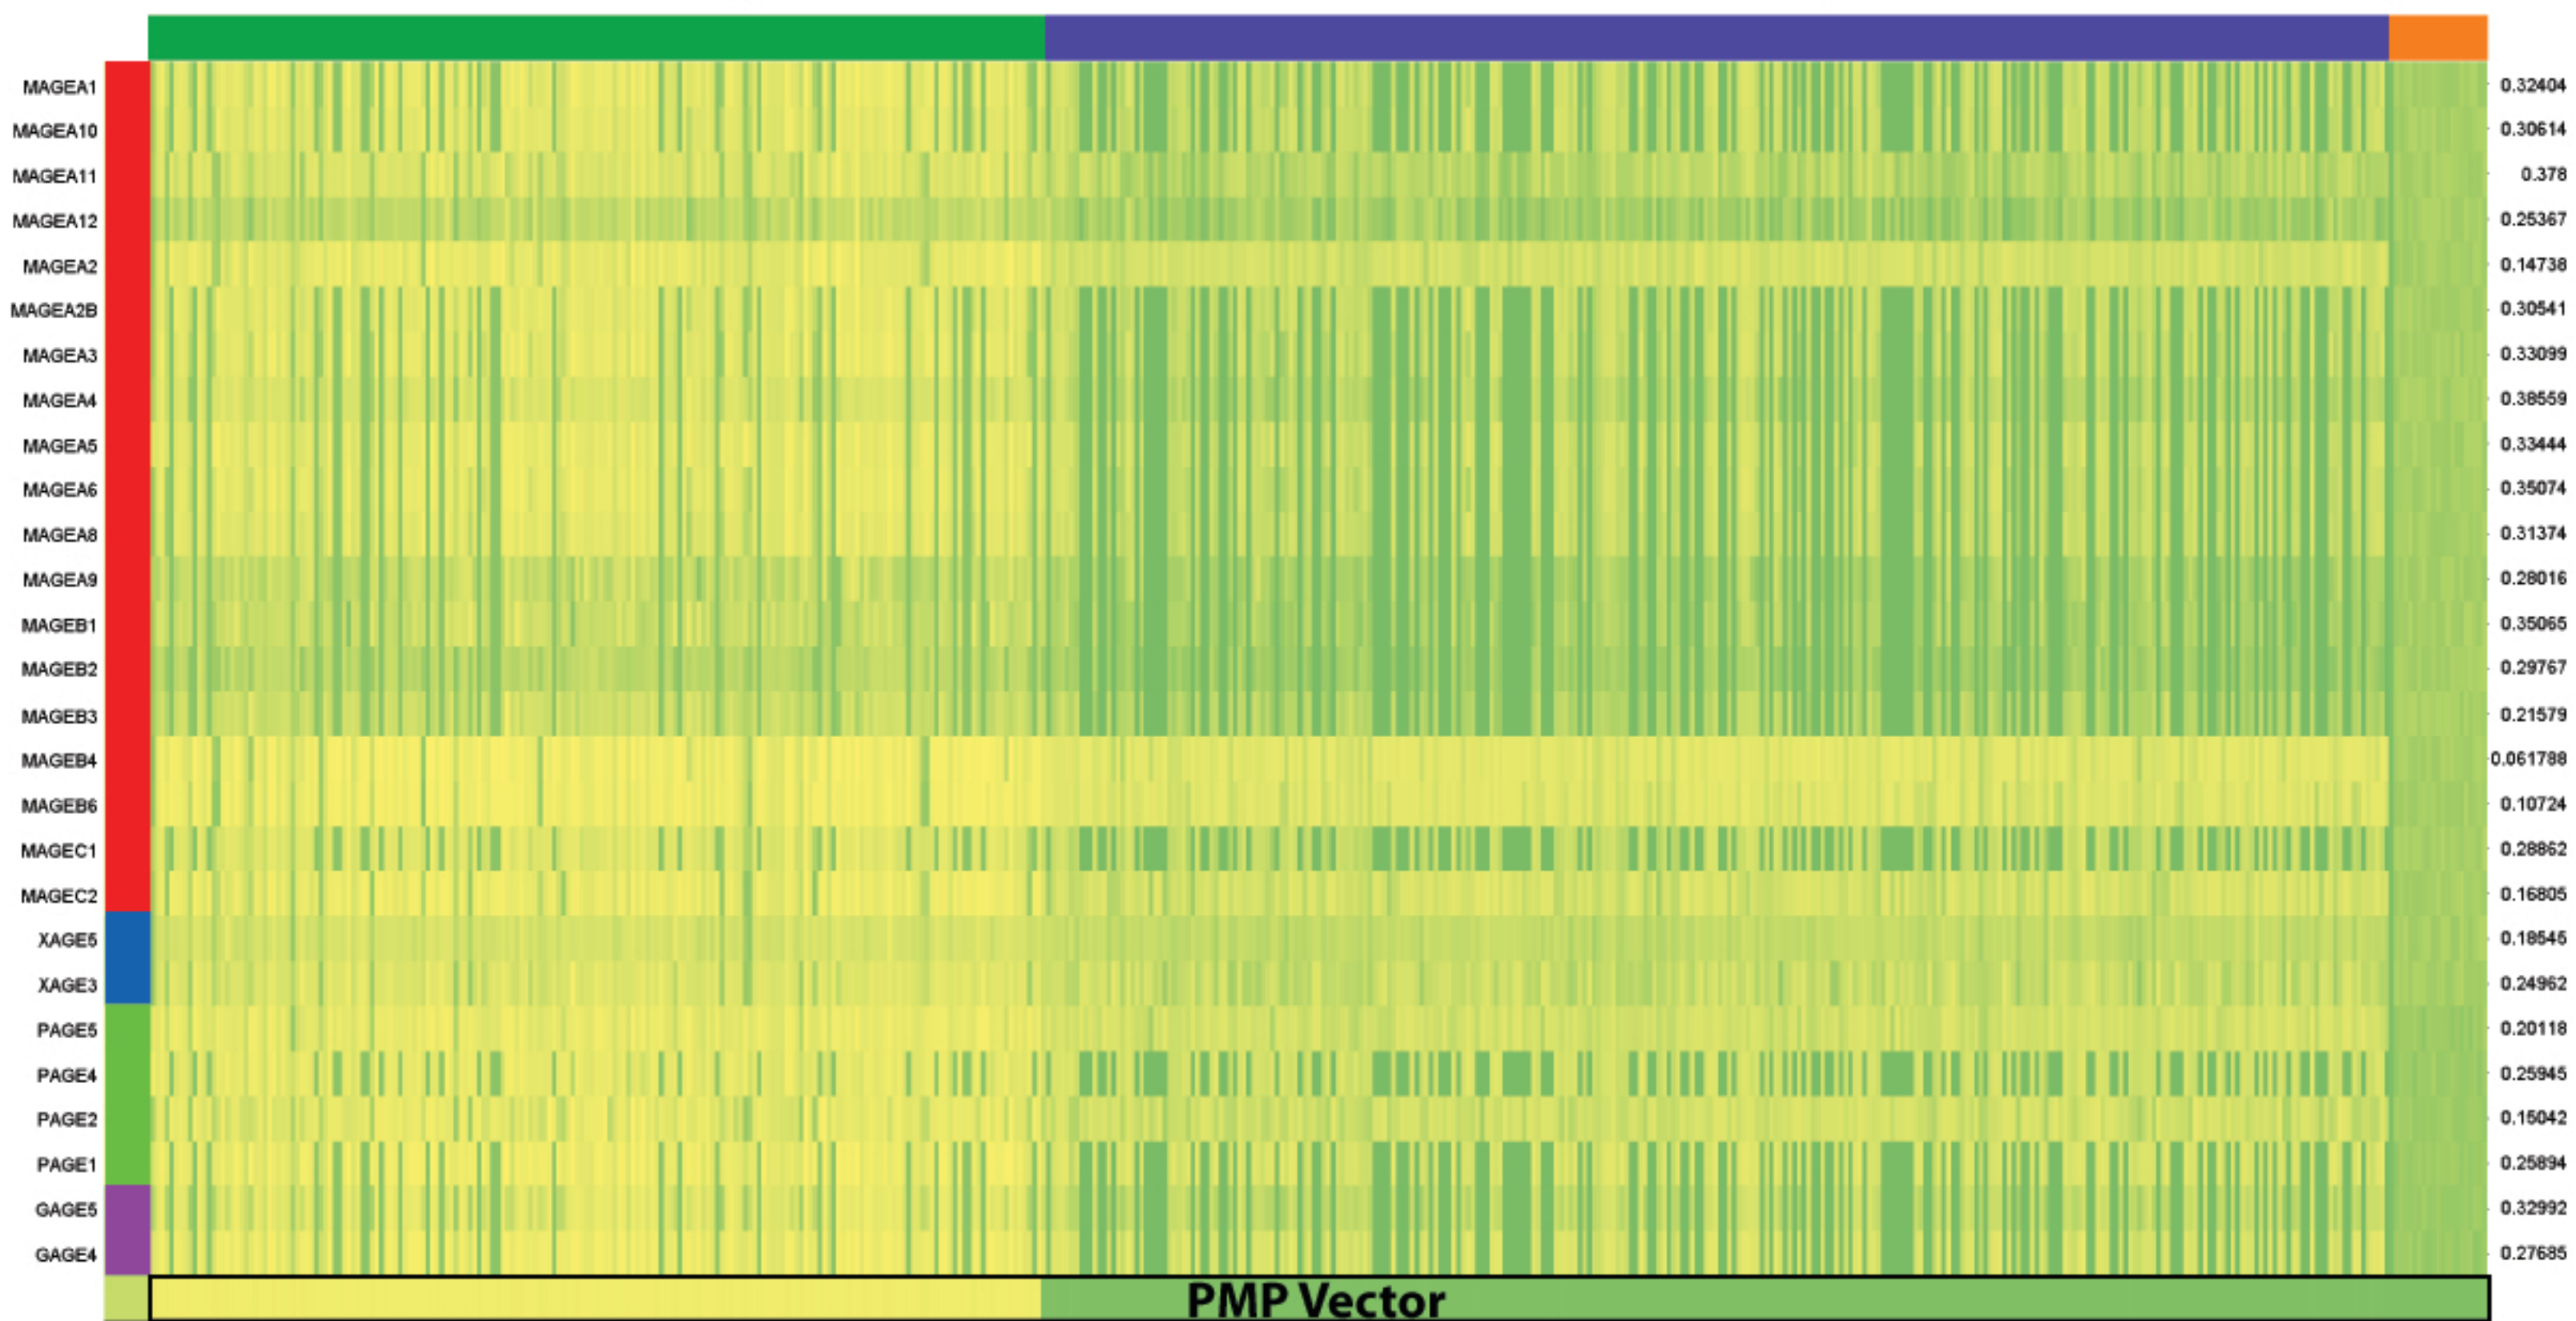

MAGE Family

XAGE Family

PAGE Family

GAGE Family

PMP-sim Values

PMP Vector

Methylation Level

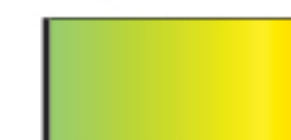

0%

100%
